# Supplementary material for: Comprehensive computational modelling of the development of mammalian cortical connectivity underlying an architectonic type principle
Source: PubMed Central journal article supplement (PMC6261046; doi:10.1371/journal.pcbi.1006550), 2018-11-26
Supplement: pcbi.1006550.s001.pdf [file pcbi.1006550.s001.pdf]

realistically oriented density gradient

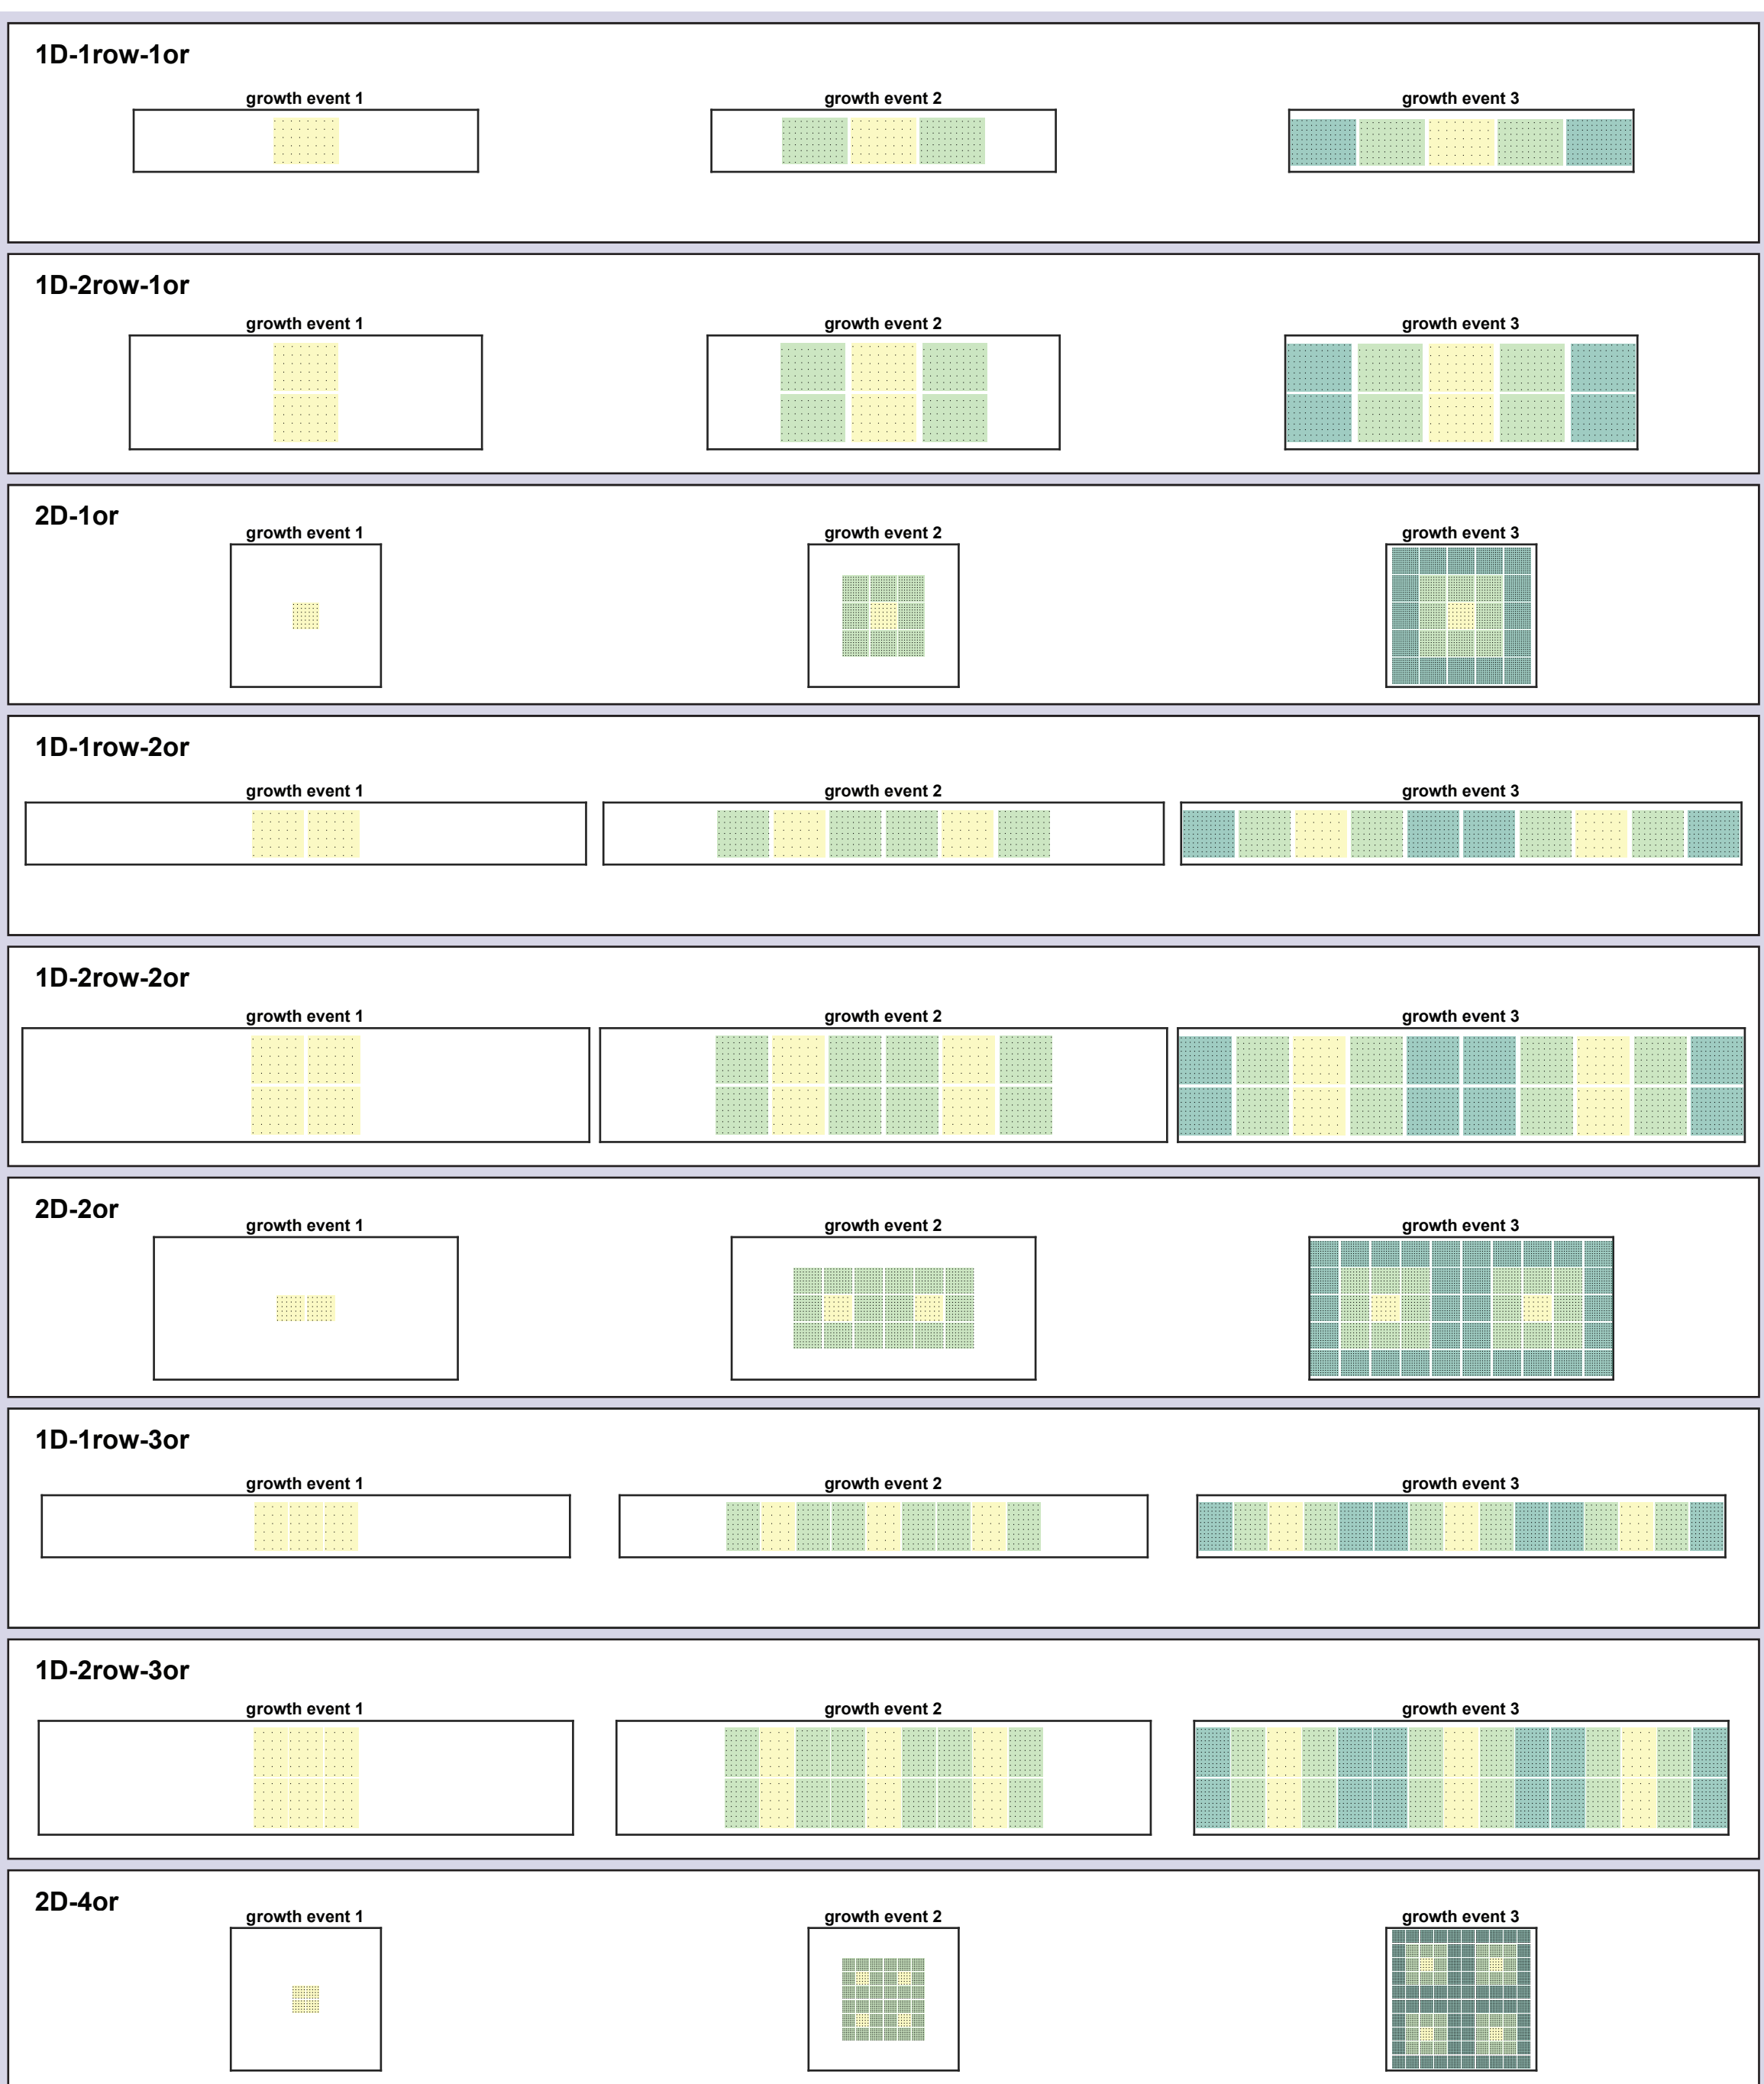

inverse

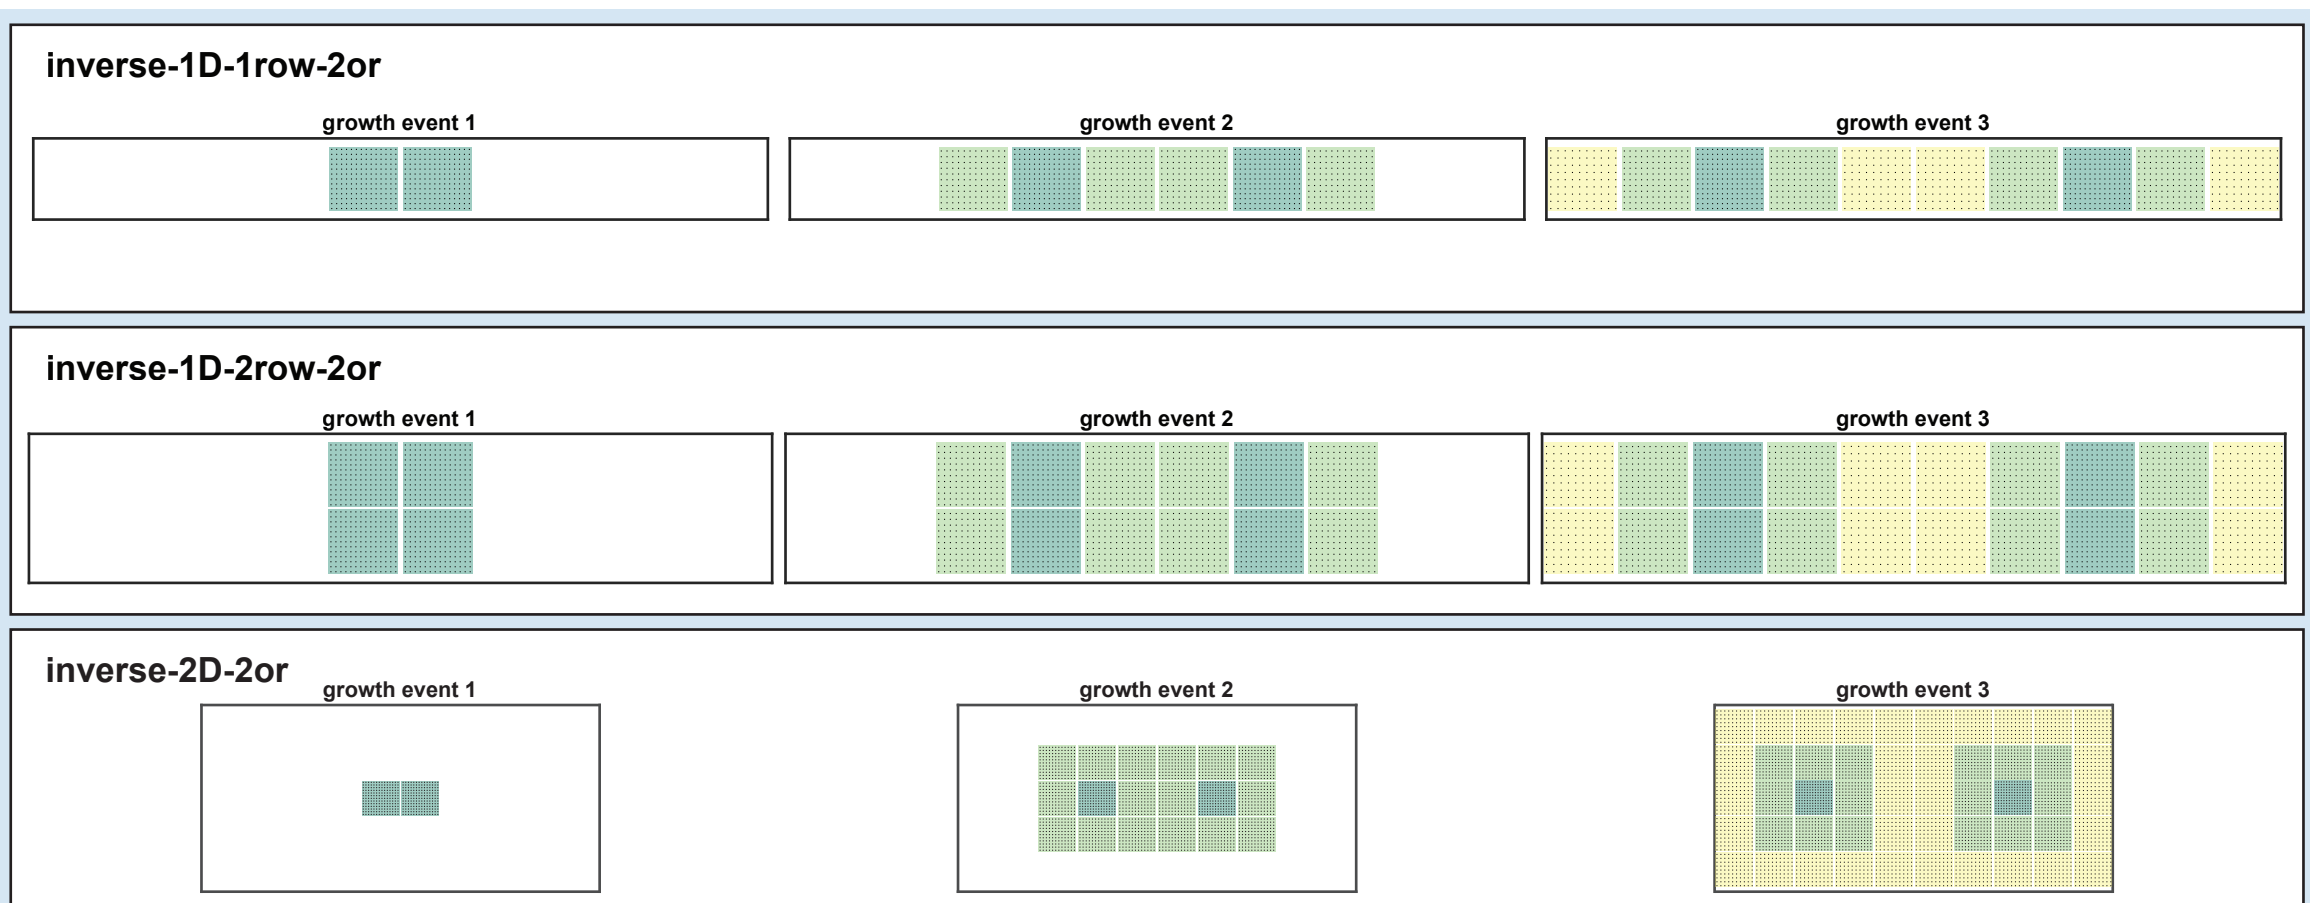

radial

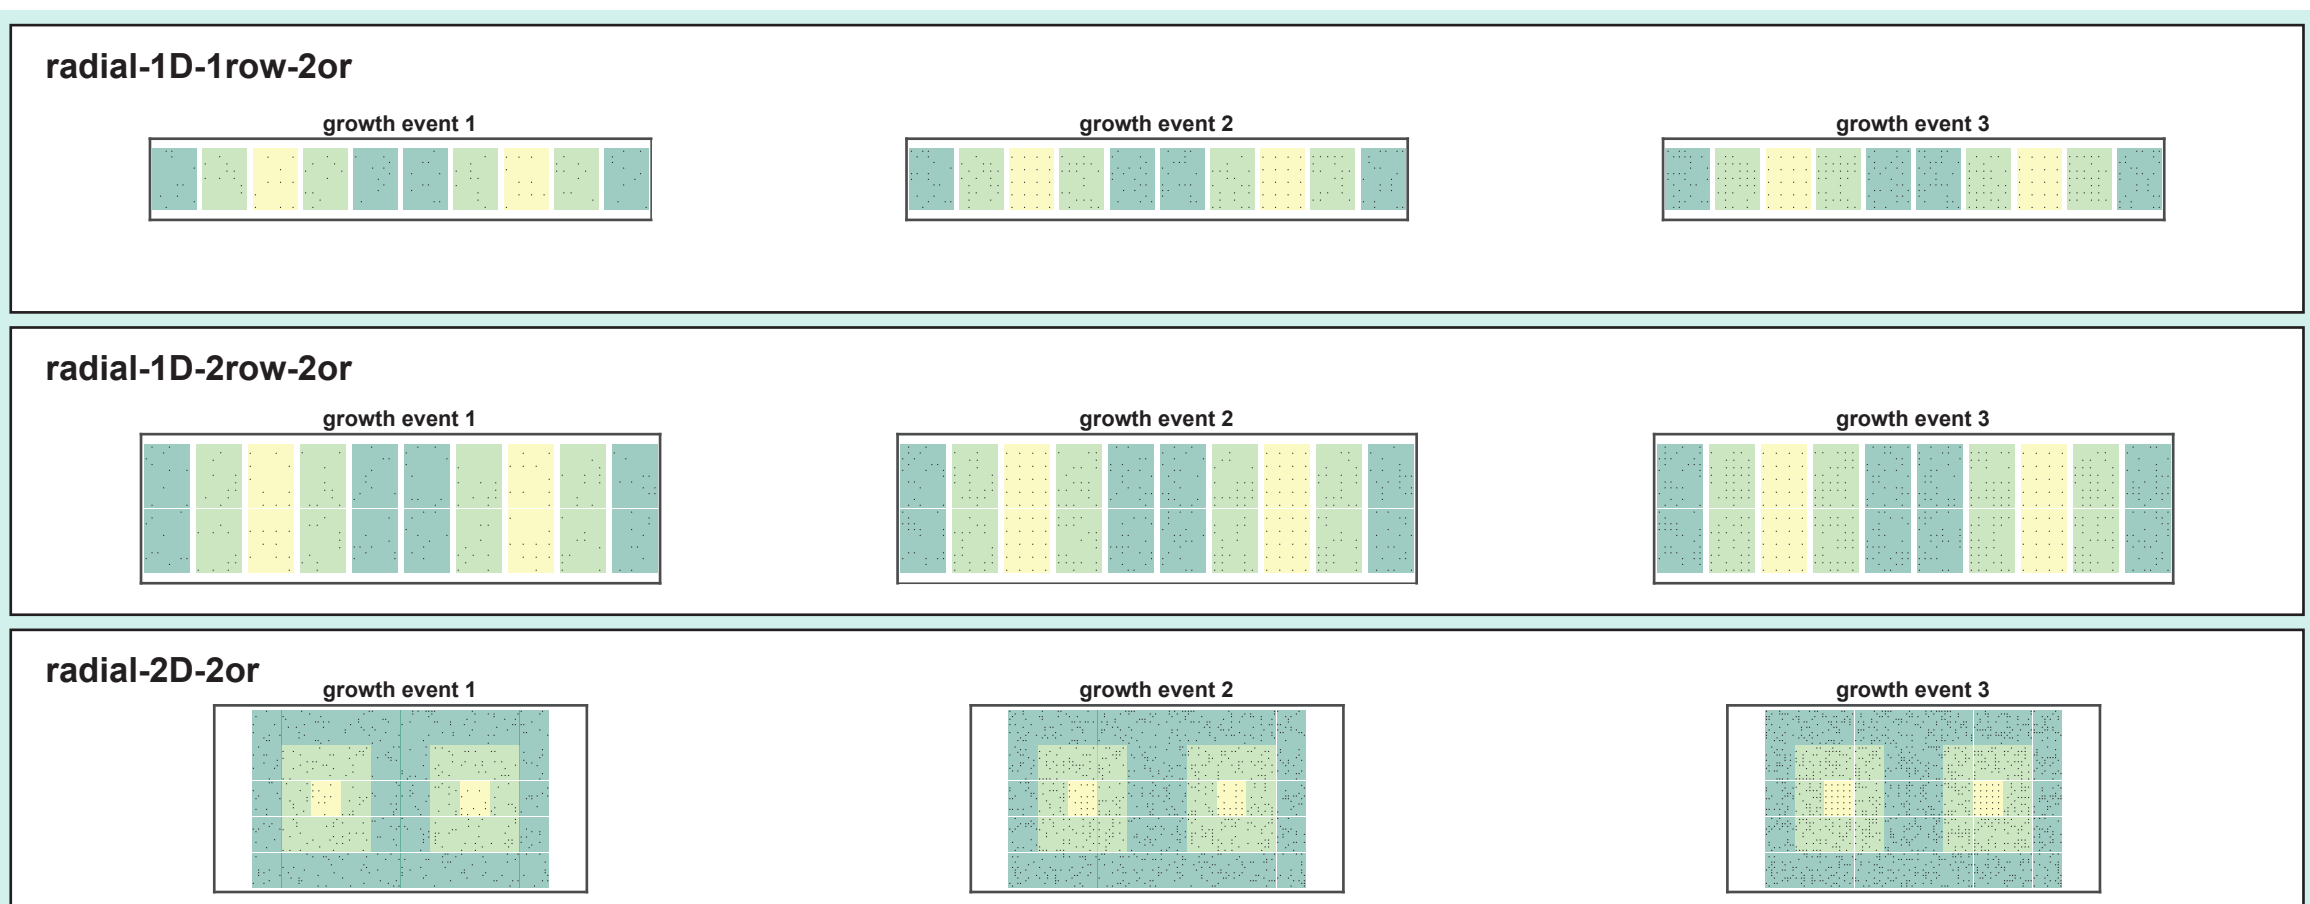

static

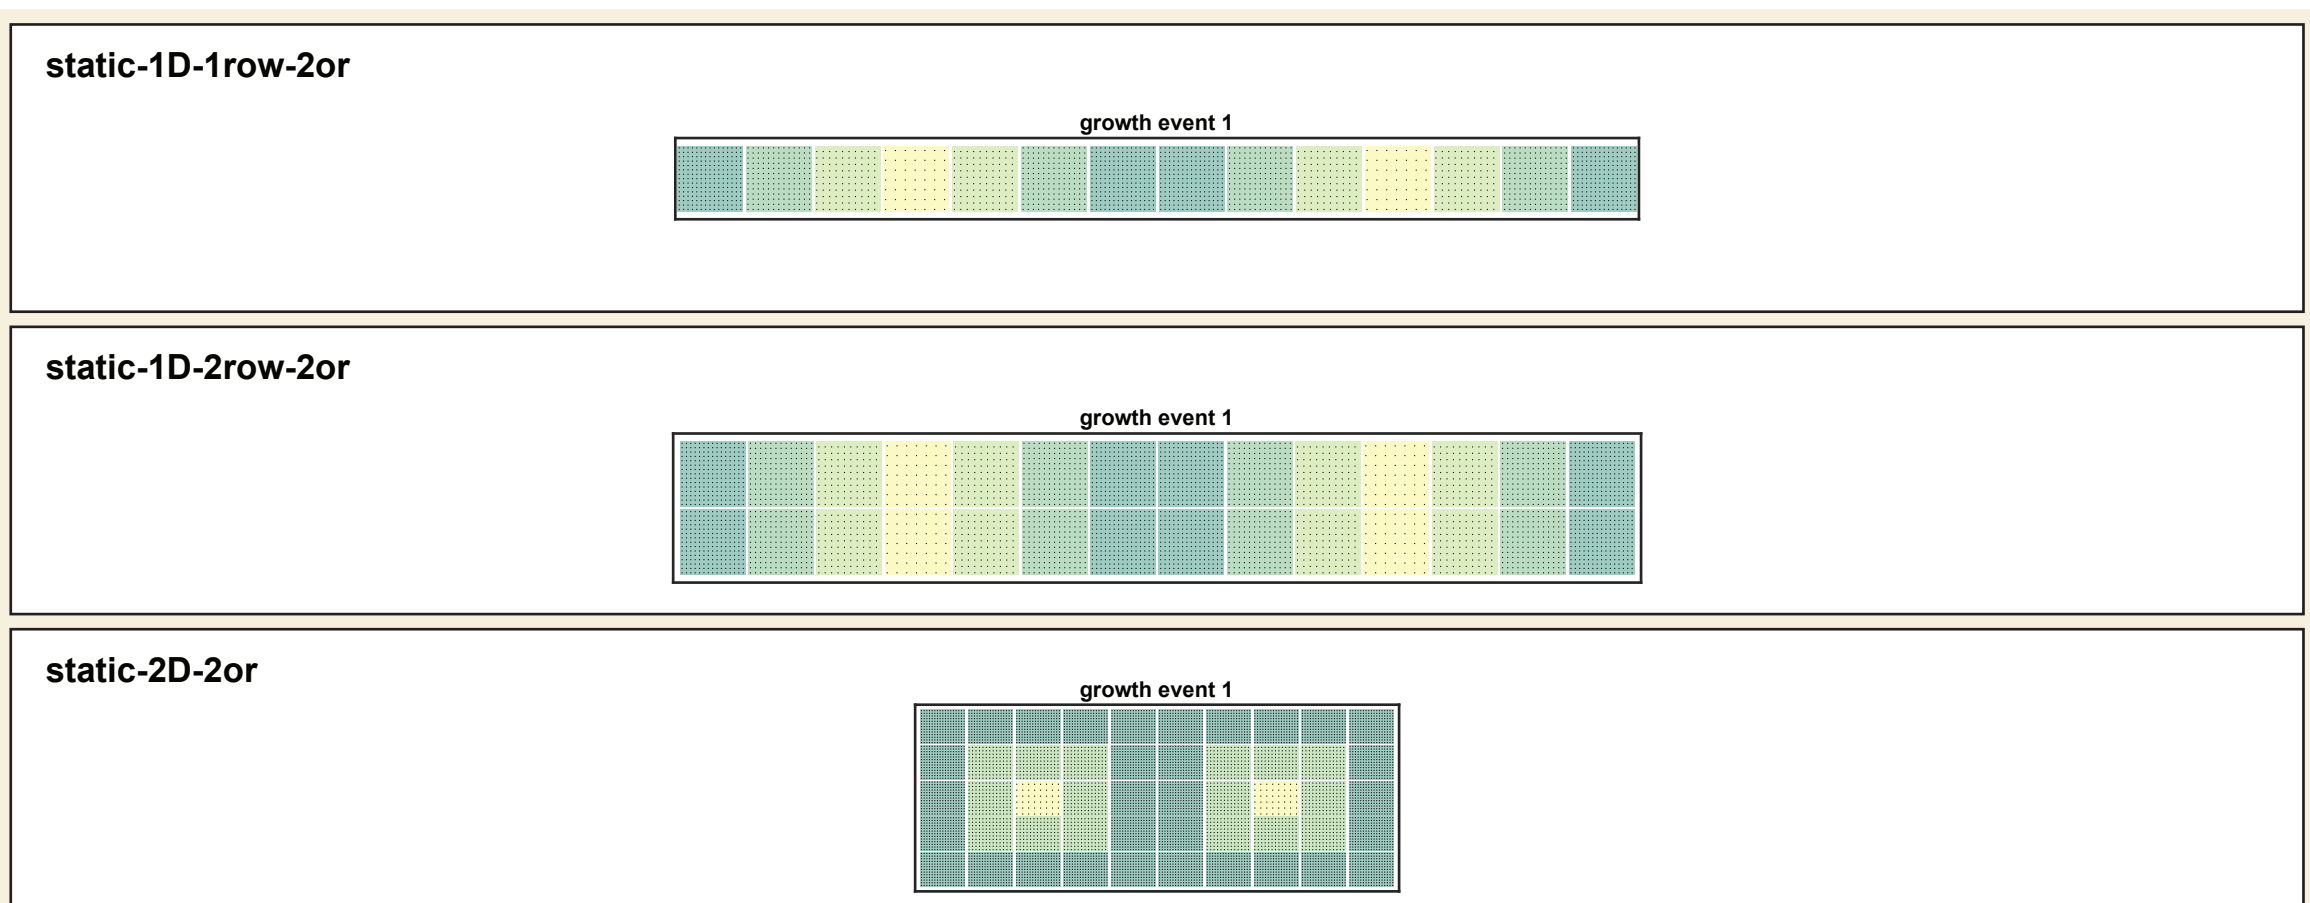

random

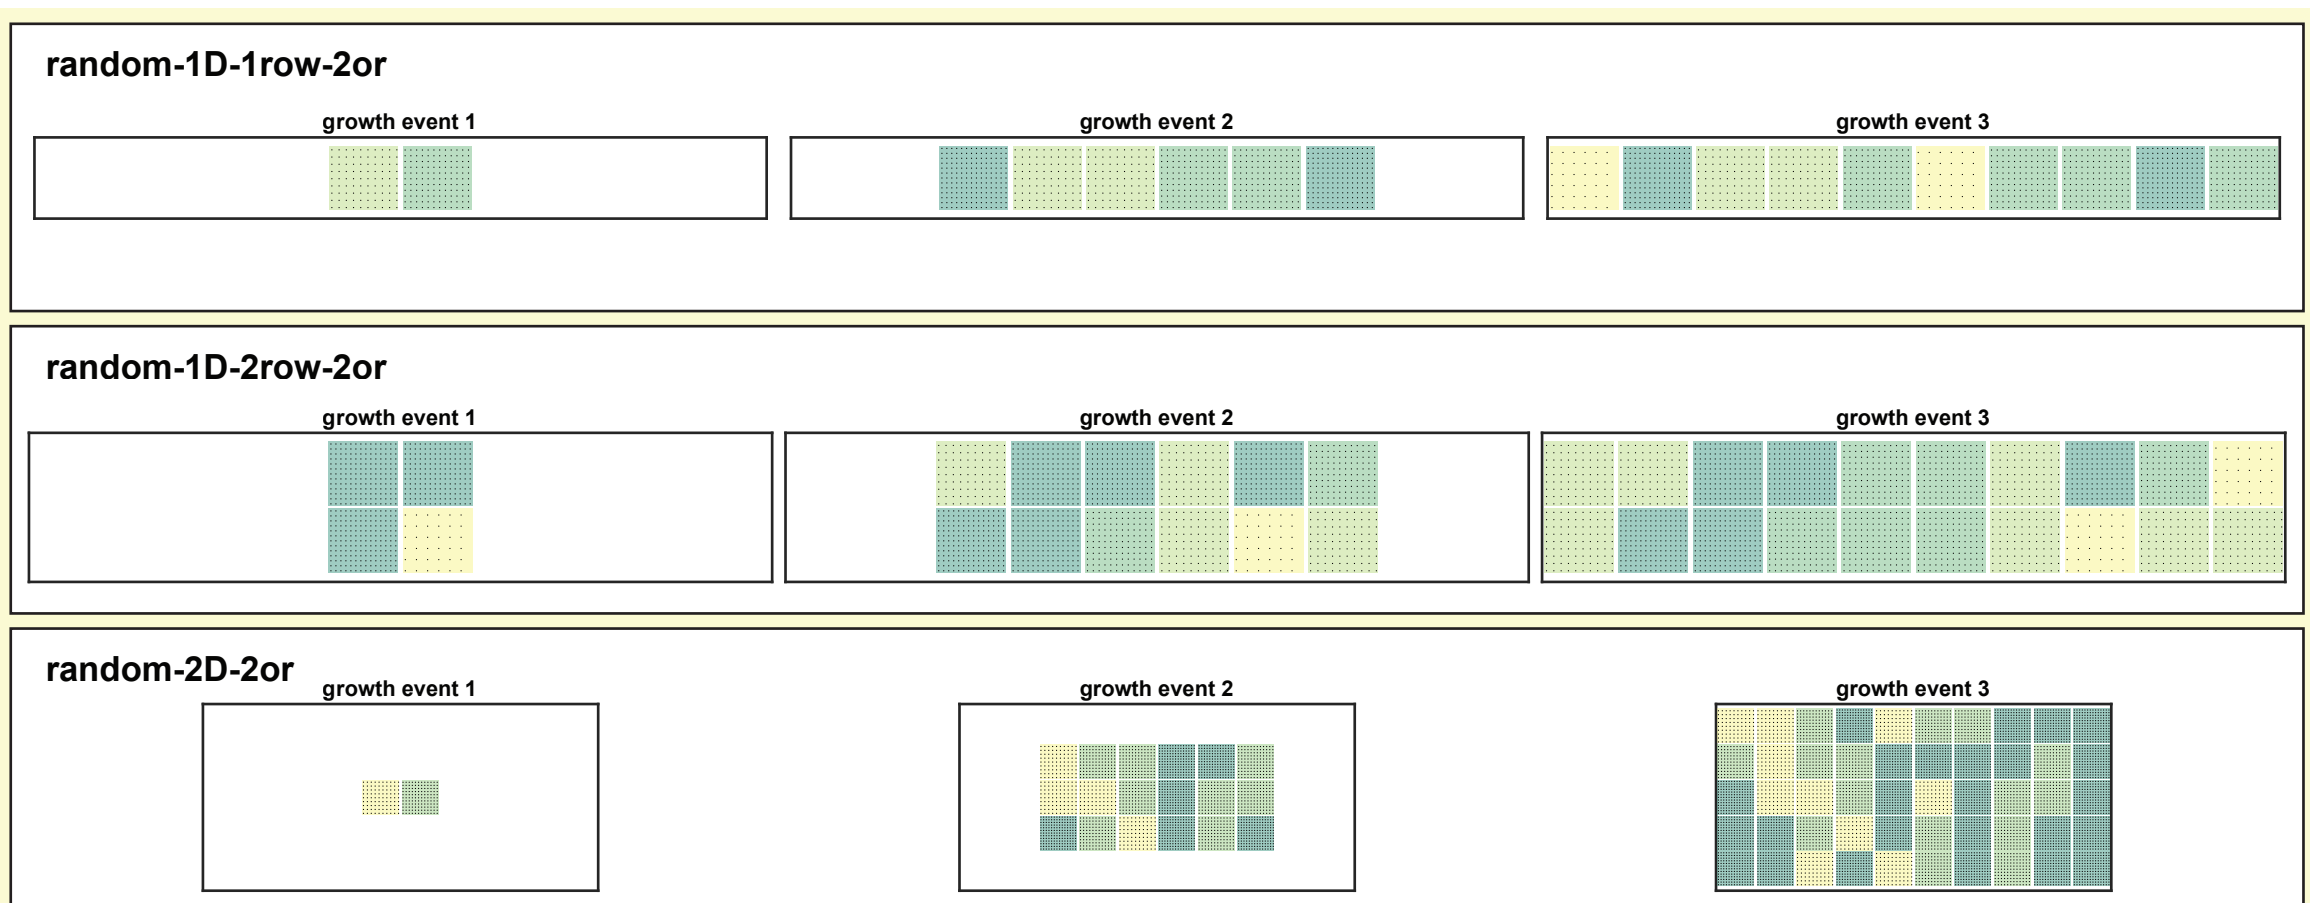

**Supplementary Figure S1. Developmental trajectories of all 21 growth layouts.** Illustration of the spatiotemporal trajectory for each growth layout. The successive population of the sheet with neurons is shown for the first three growth events. For static growth, all neurons grow simultaneously, hence only one growth event is shown.
